# Supplementary material for: The Role of Panx3 in Age-Associated and Injury-Induced Intervertebral Disc Degeneration
Source: PubMed Central journal article supplement (PMC7865929; doi:10.3390/ijms22031080), 2021-01-22
Supplement: ijms-22-01080-s001.pdf [file ijms-22-01080-s001.pdf]

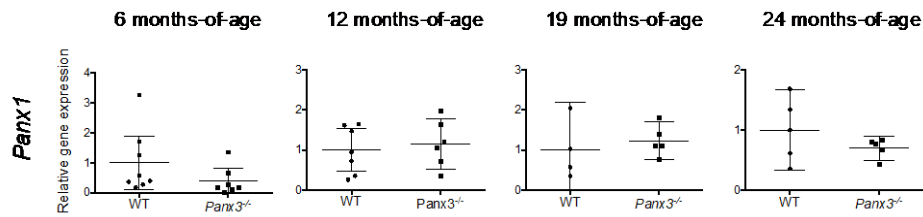

**Supplementary Figure S1.** *Panx1* expression is not altered in *Panx3<sup>-/-</sup>* mice. qPCR analysis of *Panx1* gene expression in thoracic IVDs of WT and *Panx3<sup>-/-</sup>* mice at 2, 6, 12, 19, or 24 months-of-age. Gene expression was determined by relative quantification with values normalized to that of the *Rps29* housekeeper and expressed relative to age-matched WT controls. Data are presented as mean  $\pm$  95% CI (n=4-8 mice per group. 6-8 IVDs pooled per mouse).

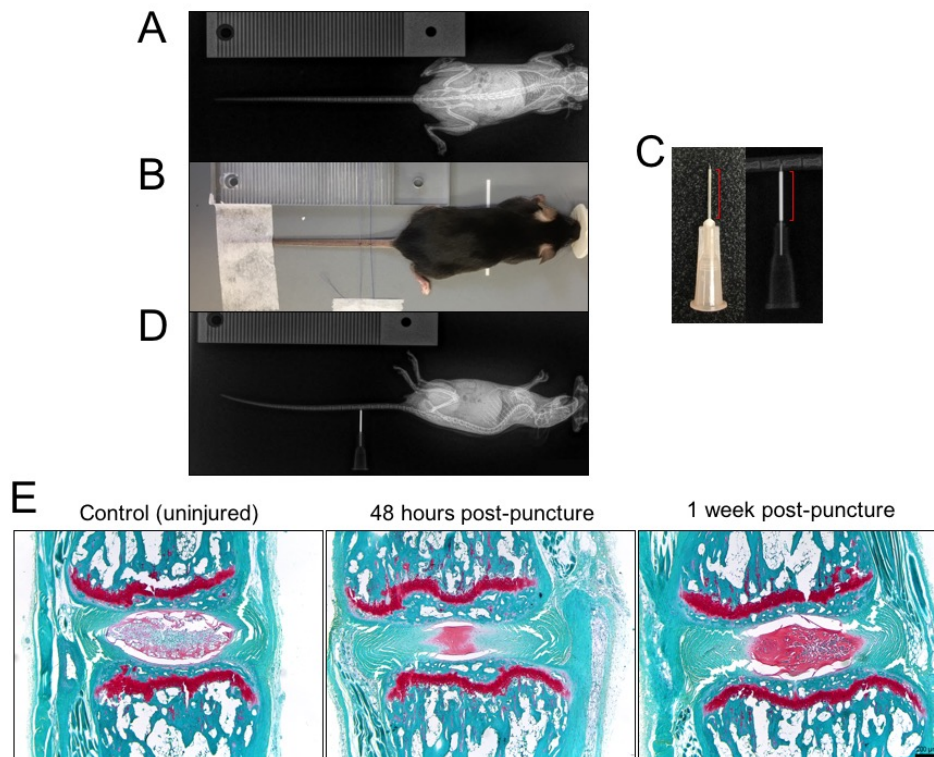

**Supplementary Figure S2.** Model of injury-induced IVD degeneration using percutaneous IVD needle puncture. Dorsal (A: X-ray; B: photograph) and sagittal (D: X-ray) view of a 2-month-old C57BL/6 mouse undergoing tail puncture procedure. (A) A dorsal X-ray is first taken to identify caudal IVDs 7/8 and 8/9 for puncture. (B) Using an electron dense measuring tool, the location of the IVDs are mapped out on the mouse tail. (C) A 30-gauge needle, guided by a 22-gauge sleeve (red bracket) to standardize depth of puncture, is then inserted through the skin into the IVD. (D) A sagittal X-ray is taken to confirm IVD puncture. (E) Mid-sagittal sections of control (non-punctured) and injured caudal IVDs stained with safranin-O/fast green demonstrate depressurization of the NP 48 hours following needle puncture, with some evidence of cell proliferation and formation of fibrous tissue repair detected after one week.

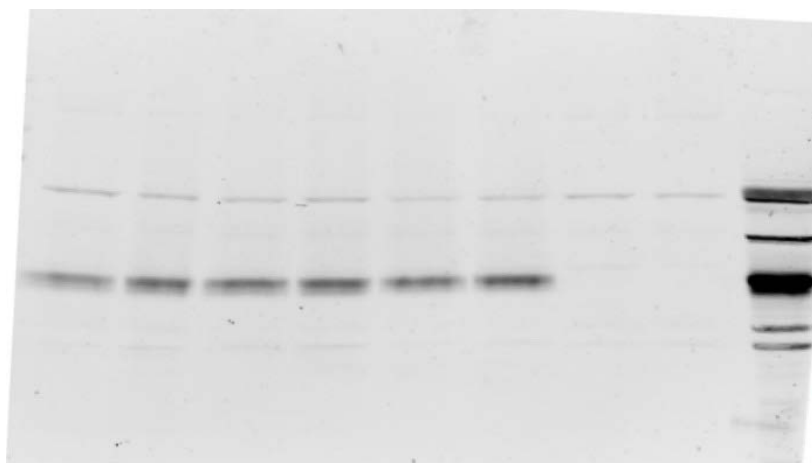

**Supplementary Figure S3.** Full unedited Western blot gel for Figure 1. Gel demonstrates PANX3 expression from whole IVD and AF tissues of three mice. From left to right, lanes represent WT 1 AF, WT 1 whole IVD, WT 2 AF, WT 2 whole IVD, WT 3 AF, WT 3 whole IVD, *Panx3*<sup>-/-</sup> AF (negative control), *Panx3*<sup>-/-</sup> whole IVD (negative control), Panx3 overexpressing human embryonic kidney (HEK) 293T cells (positive control). The five rightmost lanes are included in Figure 1.

**Supplementary Table S1.** qPCR Primer Sequences

| Gene Symbol    | Forward Primer (5' to 3') | Reverse Primer (5' to 3') |
|----------------|---------------------------|---------------------------|
| <i>Acan</i>    | CTGGGATCTACCGCTGTGAAG     | GTGTGGAAATAGCTCTGTAGTGAA  |
| <i>Vcan</i>    | TTTTACCCGAGTTACCAGACTC    | GGAGTAGTTGTTACATCCGTTG    |
| <i>Col1a1</i>  | CTGGCGGTTCAAGTCCAAT       | TCCAGGCAATCCAGGAGC        |
| <i>Col2a1</i>  | GCACATCTGGTTTGGAGAGACC    | TAGCGGTGTTGGGAGCCA        |
| <i>Mmp13</i>   | CTTCTTCTTGTTGAGCTGGAATC   | CTCTGTGGACCTCACTGTAGACT   |
| <i>Runx2</i>   | ATGGCTTGGGTTTCAAGTTAGGGA  | TGGAGTGAAGGATGAGGGCAAAT   |
| <i>Adamts4</i> | GAGGAGGAGATCGTGTTCAG      | CAAACCTCTACCTGCACCC       |
| <i>Adamts5</i> | GGAGCGAGGCCATTTACAAC      | GCGTAGACAAGGTAGCCCACCTT   |
| <i>Col10a1</i> | GGGACCCCAAGGACCTAAAG      | GCCCAACTAGACCTATCTCACCT   |
| <i>Panx1</i>   | ACAGGCTGCCTTTGTGGATTCA    | GGGCAGGTACAGGAGTATG       |
| <i>Panx2</i>   | TGGTACCCATCCTGCTGGT       | GGGTGAAGTTGTGCGGAGT       |
| <i>Panx3</i>   | TTTCGCCAGGAGTTCTCATC      | CCTGCCTGACACTGAAGTTG      |

**Publisher's Note:** MDPI stays neutral with regard to jurisdictional claims in published maps and institutional affiliations.

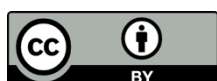

© 2021 by the authors. Submitted for possible open access publication under the terms and conditions of the Creative Commons Attribution (CC BY) license (<http://creativecommons.org/licenses/by/4.0/>).
